# Supplementary material for: Craniomandibular Trauma and Tooth Loss in Northern Dogs and Wolves: Implications for the Archaeological Study of Dog Husbandry and Domestication
Source: PLoS One. 2014 Jun 18;9(6):e99746. doi: 10.1371/journal.pone.0099746 (PMC4062439; doi:10.1371/journal.pone.0099746)
Supplement: Table S1 — Catalog numbers for specimens analyzed in this study. (XLSX) [file pone.0099746.s002.xlsx]

## Sheet: Sheet1
Canadian Arctic Wolves	Alberta Wolves	Russian Arctic Wolves	Russian Subarctic Wolves	Ellesmere Dogs	Greenland Dogs	Chukotka Dogs	Bering Island Dogs	Sakha Dogs	Kamchatka Dogs	N. Far East Dogs	Sakhalin Dogs	Trans-Baikal Dogs
5550	65.62.1	3260	1837	36087	14046	AMNH specimens	9290	9285	1293	20499	5812	9321
52793	69.44.1	6117	4519	51169	14445	18236	9291	9286	1724	20497	5826	9322
54679	69.44.2	6126	6116	35152	13681	18229	9292	15073	2848	20498	1716	9323
54676	72.100.1	6127	6119	51168	31649	18224	9293	15074	3064	20500	1752	9324
54680	73.88.1	8061	6128	51170	14045	18227	9294	15261	3430	20501	2308	9325
54634	73.93.28	8122	6133	35158	14047	18222	9295	12610	3432	20502	2601	9326
54635	75.5.1	8123	13661	35163	11013/12725	18230	9296	8052	3433	18659	3061
54648	75.5.2	11133	13662	35221	11012/12724	18231	9297	8051	3434		3062
54649	75.5.3	12679	14751	35157	14896	18232	9298	8053	3435		16379
54663	75.16.1	12680	15717	35159	14050	18228	9299	9305	3437
21465	76.10.1	12681	16126	36085	14048	18225	9313	16125	3439
21544	76.10.2	12682	16127	35164	14049	18221		1799
22024	76.10.3	12683	16128	35154	14051	18220		12609
54627	76.10.4	12684	16129	35223		18234		11095
54629	76.10.5	12685	16130	35154		18235		9289
54622	76.10.6	12686	16131	36088		ZIRAS specimens		13543
54621	76.10.7	13538	16159	35220		5813		12768
35217	76.10.8	13539	18617	35155		14733		12689
35165	76.10.9	13540	33064	35151		14734		12767
21733	76.10.10	13541	33065	35153		14735		13544
21731	76.10.11	13542	33066	35156		5820		15715
75561	76.10.12	13562	33067	35160		5814
51177	76.10.13	13664	33069	51171		5806
51178	76.10.14	13665	33070	51172		5811
54620	76.10.15	13859	33074			5808
54778	76.10.16	13882	33075			20030
54776	76.10.17	14235	33076			20031
54777	76.10.18	14236	33078			20032
54774	76.10.19	14237	33079			20033
21563	76.10.20	14238	33080			20034
21472	76.10.21	14239	33081			20035
54233	76.10.22	15577	33082			20036
54696	76.10.23	18749	33083			20037
54694	76.10.24	18750	33084			20039
54695	76.10.25	18751	33086			20040
54642	76.10.26	18752	33087			20041
54697	76.10.27	18753	33088			20042
52795	76.10.28	19015	33089			20043
52796	76.10.29	19017	33085			5821
52794	76.10.30	19018	13663			27372
54670	76.10.31	19022	9110a			29925
52798	76.10.32	20818	9110b			29157a
54686	76.10.33	21181				29157b
54677	76.10.34	21182				29157c
52797	76.10.35	21183
54683	76.10.36	24356
54685	76.10.37	24357
54659	76.10.38	29753
54637	76.10.39	31327
54638	76.10.40	36077
54636	76.10.41
54644	76.10.42
54646	76.10.43
54657	76.10.44
54650	76.10.45
54651	76.10.46
54655	76.10.47
54645	76.10.48
54664	76.10.49
54665	76.10.50
54692	76.10.51
21464	76.10.52
21466	76.10.53
22025	76.10.54
22026	76.10.55
21458	76.10.56
54627	76.10.57
21528	76.10.58
54624	76.10.59
54625	76.10.60
8802	76.10.61
8803	76.10.62
8804	76.10.63
21530	76.10.64
21521	76.10.65
21522	76.10.66
21523	76.10.67
26317	76.10.68
26316	76.10.69
21456	76.10.70
21454	76.10.71
21730	76.10.72
21604	76.10.73
21732	76.10.74
35218	76.10.75
21566	76.10.76
21565	76.10.77
21564	76.10.78
21520	76.26.1
54234	76.69.1
6048	76.69.2
6232	76.69.3
5741	76.69.4
54688	76.69.5
21529	76.69.6
21457	76.69.7
54785	76.69.8
22907	76.69.9
21471	76.69.10
21469	76.69.11
54632	76.69.12
54658	76.69.13
54675	76.69.14
54682	76.69.15
54681	76.69.16
21470	76.69.17
54684	76.69.18
54647	76.69.19
54662	76.69.20
54633	76.69.21
51176	76.69.22
39746	76.69.23
54773	76.69.24
54772	76.69.25
54693	76.69.26
54639	78.104.1
54640	78.104.2
54643	78.104.3
54641	78.104.5
54678	80.42.4
54689	80.42.5
54687	80.91.9
54779	81.42.1
54623	81.42.2
54783	81.42.3
21474	81.42.4
54669	81.42.5
54666	81.42.6
54668	81.56.1
39745	81.56.2
54780	81.56.3
	81.56.4
	81.56.5
	81.56.6
	81.56.7
	81.56.8
	81.56.9
	81.56.10
	81.56.11
	81.56.12
	81.56.13
	81.56.14
	81.56.15
	81.56.16
	81.56.17
	81.56.18
	81.56.19
	81.56.20
	81.56.21
	81.56.22
	81.56.23
	81.56.24
	81.56.25
	81.56.26
	81.56.27
	81.82.1
	81.151.1
	81.151.2
	81.151.3
	82.16.1
	82.16.2
	82.40.1
	82.40.2
	82.40.3
	90.8.1
	90.8.2
	90.8.3
	90.20.1
	91.47.1
	91.47.2
	94.6.1
	94.6.2
	94.6.3
	94.6.4
	95.6.1
	95.6.2
	95.6.3
